# Supplementary material
Source: PubMed Central journal article supplement (PMC2922572)
Supplement: 1005274107_pnas.201005274SI.pdf [file 1005274107_pnas.201005274SI.pdf]

# Supporting Information

Shebelut et al. 10.1073/pnas.1005274107

## SI Materials and Methods

**Strains and Strain Construction. ZG192.** For ZG192, a  $\text{kan}^r$  *mCherry-parB* clone was introduced into the *xylX* locus in CB15N. A  $\text{tet}^r$  *GFP-ParA* was then subsequently introduced into the *xylX* locus. Details about the construction of the *mCherry-parB* plasmid are described in ref. 1. To create the  $\text{tet}^r$  *pxyl-GFP-parA* construct, a Gateway (Invitrogen) compatible vector was created by cloning the Gateway cassette into the MCS of pXGFP4-C1. A subsequent Gateway LR reaction was performed using a *parA* entry vector (1) to create the *pxyl-GFP-parA* fusion. The resistance of this plasmid was then change from kanamycin to tetracycline using the EZ-Tn5 <TET-1> insertion kit (Epicenter Biotechnologies #EZI921T).

1. Werner JN, et al. (2009) Quantitative genome-scale analysis of protein localization in an asymmetric bacterium. *Proc Natl Acad Sci USA* 106:7858–7863.
2. Collier J, Shapiro L (2009) Feedback control of DnaA-mediated replication initiation by replisome-associated HdaA protein in *Caulobacter*. *J Bacteriol* 191:5706–5716.

**ZG194.** For ZG194, an *mCherry-dnaN* fusion was introduced into the *xylX* locus in CB15N. Details of the *mCherry-dnaN* construct are described in ref. 1. This strain was modeled on the work from Collier and Shapiro (2).

**ZG195.** For ZG195, first wild-type *parA* was amplified and cloned into pET28. The *parA*<sub>K20R</sub> mutation was created using the Quik-Change Site-Directed Mutagenesis Kit (Stratagene #200518), with the following primers: F-5' CAAAAGGGTGGGGTGGG-GAGGACCACGACCGCGATCAAT and R-5' ATTGATCGC-GGTCGTGGTCCCTCCCCACCCACCCCTTTTG. The *parA*<sub>K20R</sub> ORF was then PCR amplified with Gateway compatible primers and Gateway cloned into gXRC (1). This mutant was based on a previously characterized mutant (3).

3. Toro E, Hong SH, McAdams HH, Shapiro L (2008) *Caulobacter* requires a dedicated mechanism to initiate chromosome segregation. *Proc Natl Acad Sci USA* 105:15435–15440.

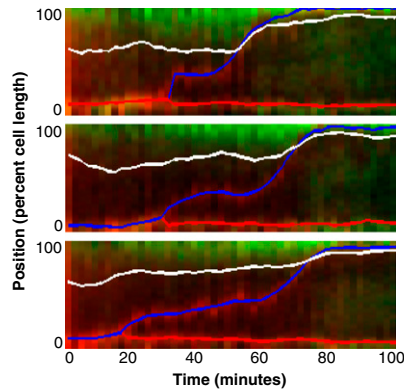

**Fig. S1.** ParA retracts upon ParB association and appears to pull ParB to the distal pole. Kymographs of three individual cells coexpressing GFP-ParA and mCherry-ParB. The kymographs are a composite of the cell's GFP-ParA (green) and mCherry-ParB (red) fluorescence intensities at 2-min intervals over a 100-min time-course. The red and blue curves display the positions of the proximal (red) and distal (blue) mCherry-ParB foci. The white line indicates a normalized threshold of GFP-ParA intensity (see *Materials and Methods* for details).











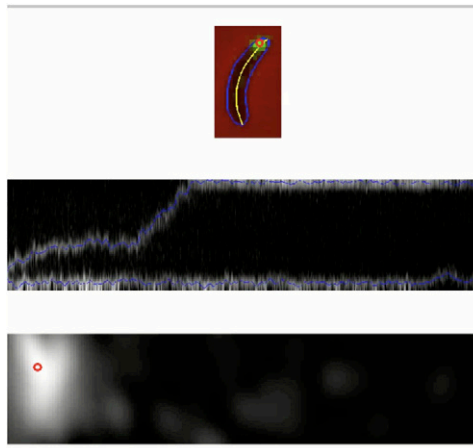

**Movie S1.** A movie illustrating the analysis pipeline with a representative cell including the raw image (*Top*), 1D PSICIC tracking (*Middle*), and 2D representation (*Bottom*).

[Movie S1](#)
